# Supplementary material
Source: Springer Nature journal article supplement (https://www.springermedizin.de/resource/supplementary/12985_2013_2331_MOESM4_ESM.pdf/9606504)

**A**

500 bp

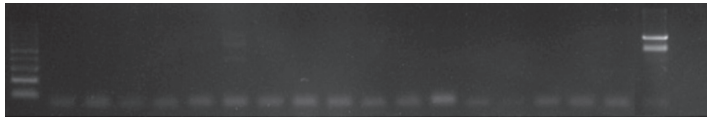

GAG-I-F/R

**B**

500 bp

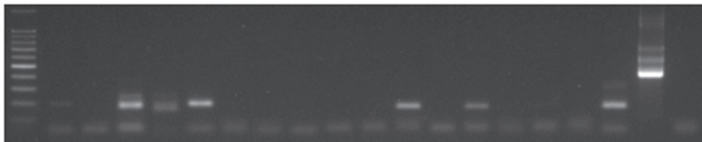

NP116/117

M 1 2 3 4 5 6 7 8 9 10 11 12 13 14 15 16 17 18 19

Supplement: MOESM4 [file 9606504]
